# Supplementary material for: Large Benefit from Simple Things: High-Dose Vitamin A Improves RBP4-Related Retinal Dystrophy
Source: MDPI journal article supplement (doi:10.3390/ijms23126590), 2022-06-13
Supplement: s1 [file s1]

# Supplementary Appendix.

Figure S1.....p.2

Figure S2.....p.3

Figure S3.....p.4

Figure S4.....p.5

# Supplementary Figure S1 . Kinetic visual field

## A. Goldman VF before treatment

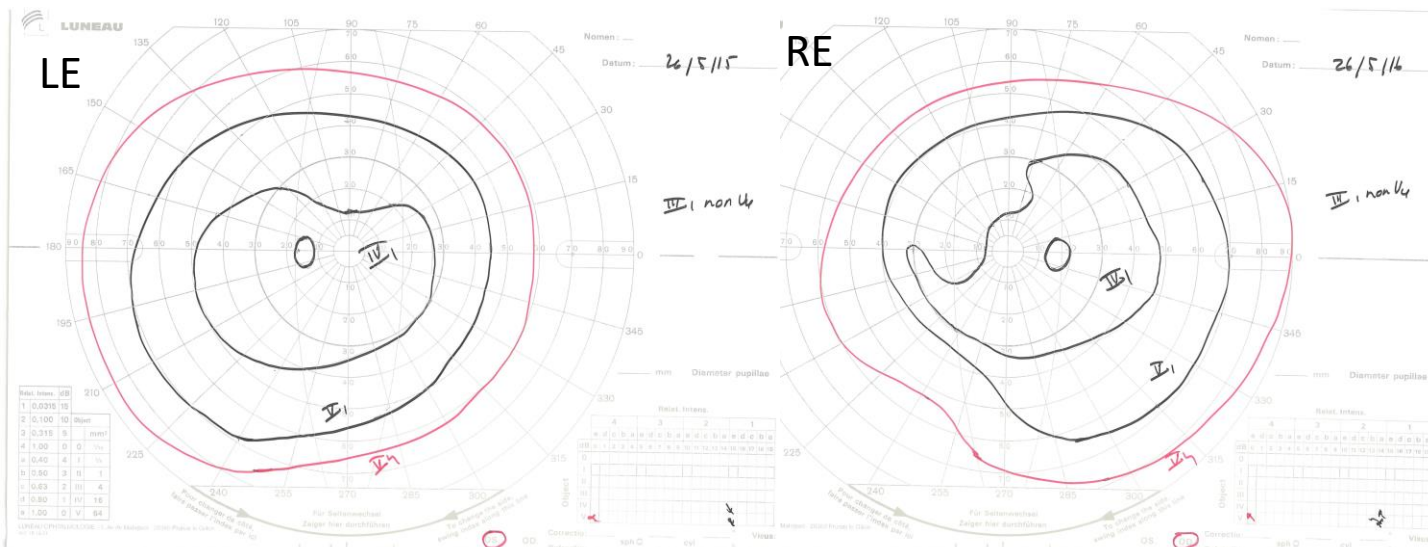

## C. Octopus kinetic VF M+5

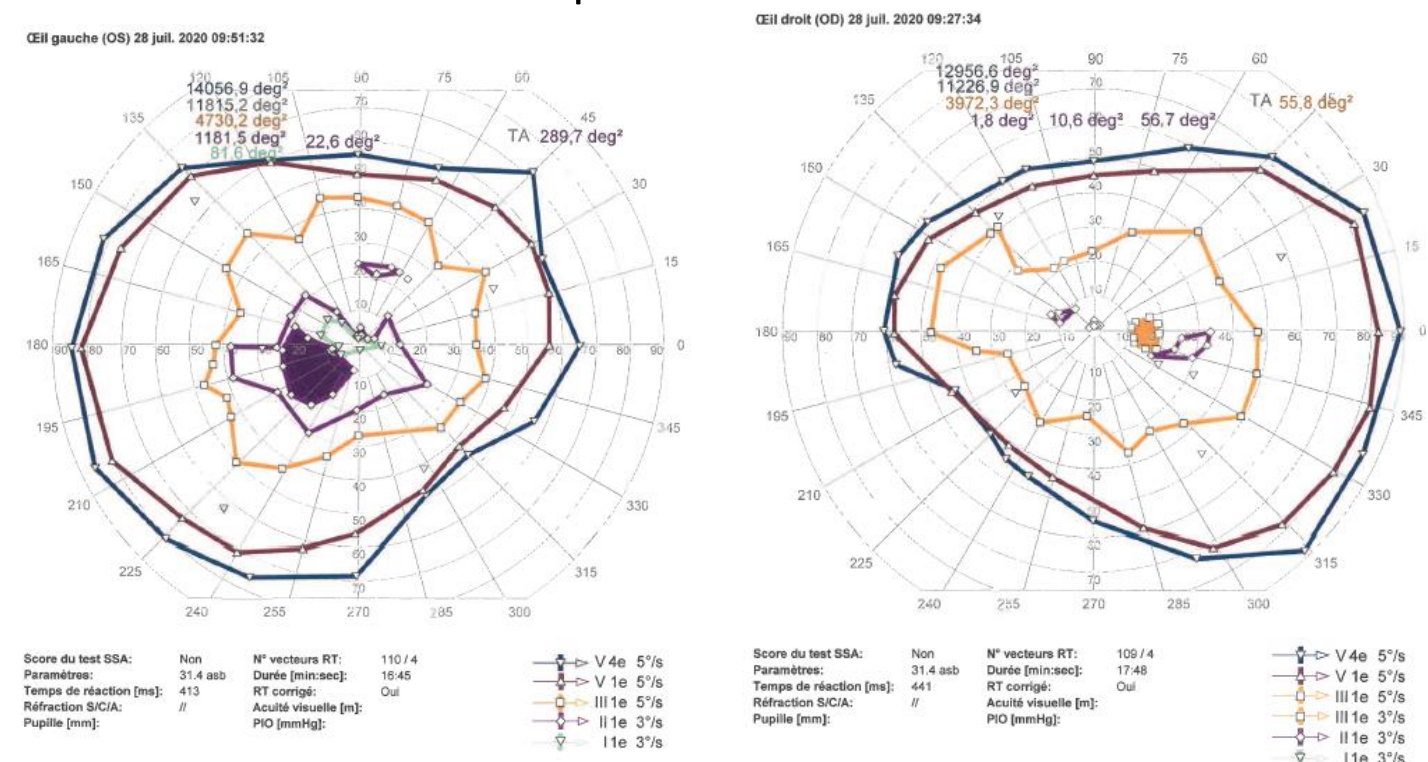

## C. Octopus kinetic VF M+12

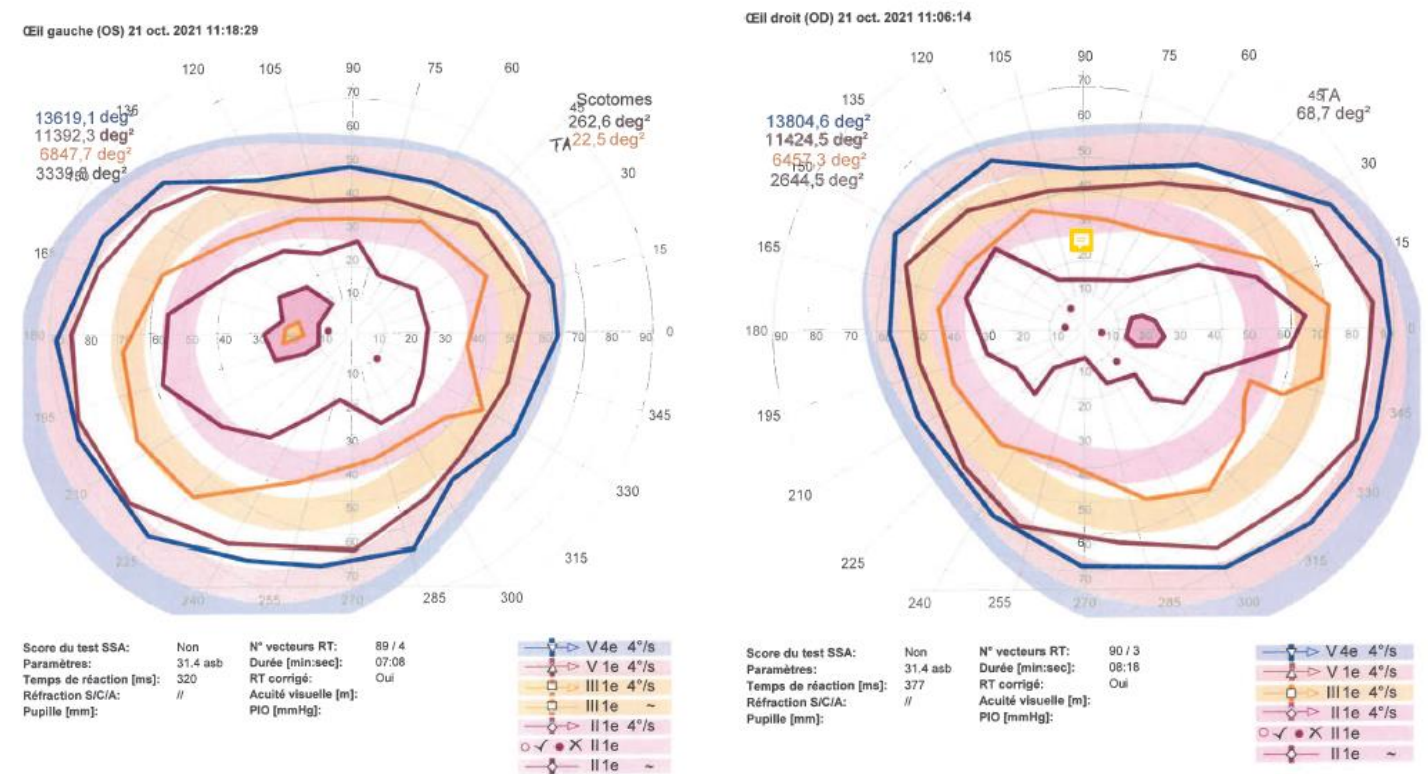

# Supplementary Figure S2

## ffERG

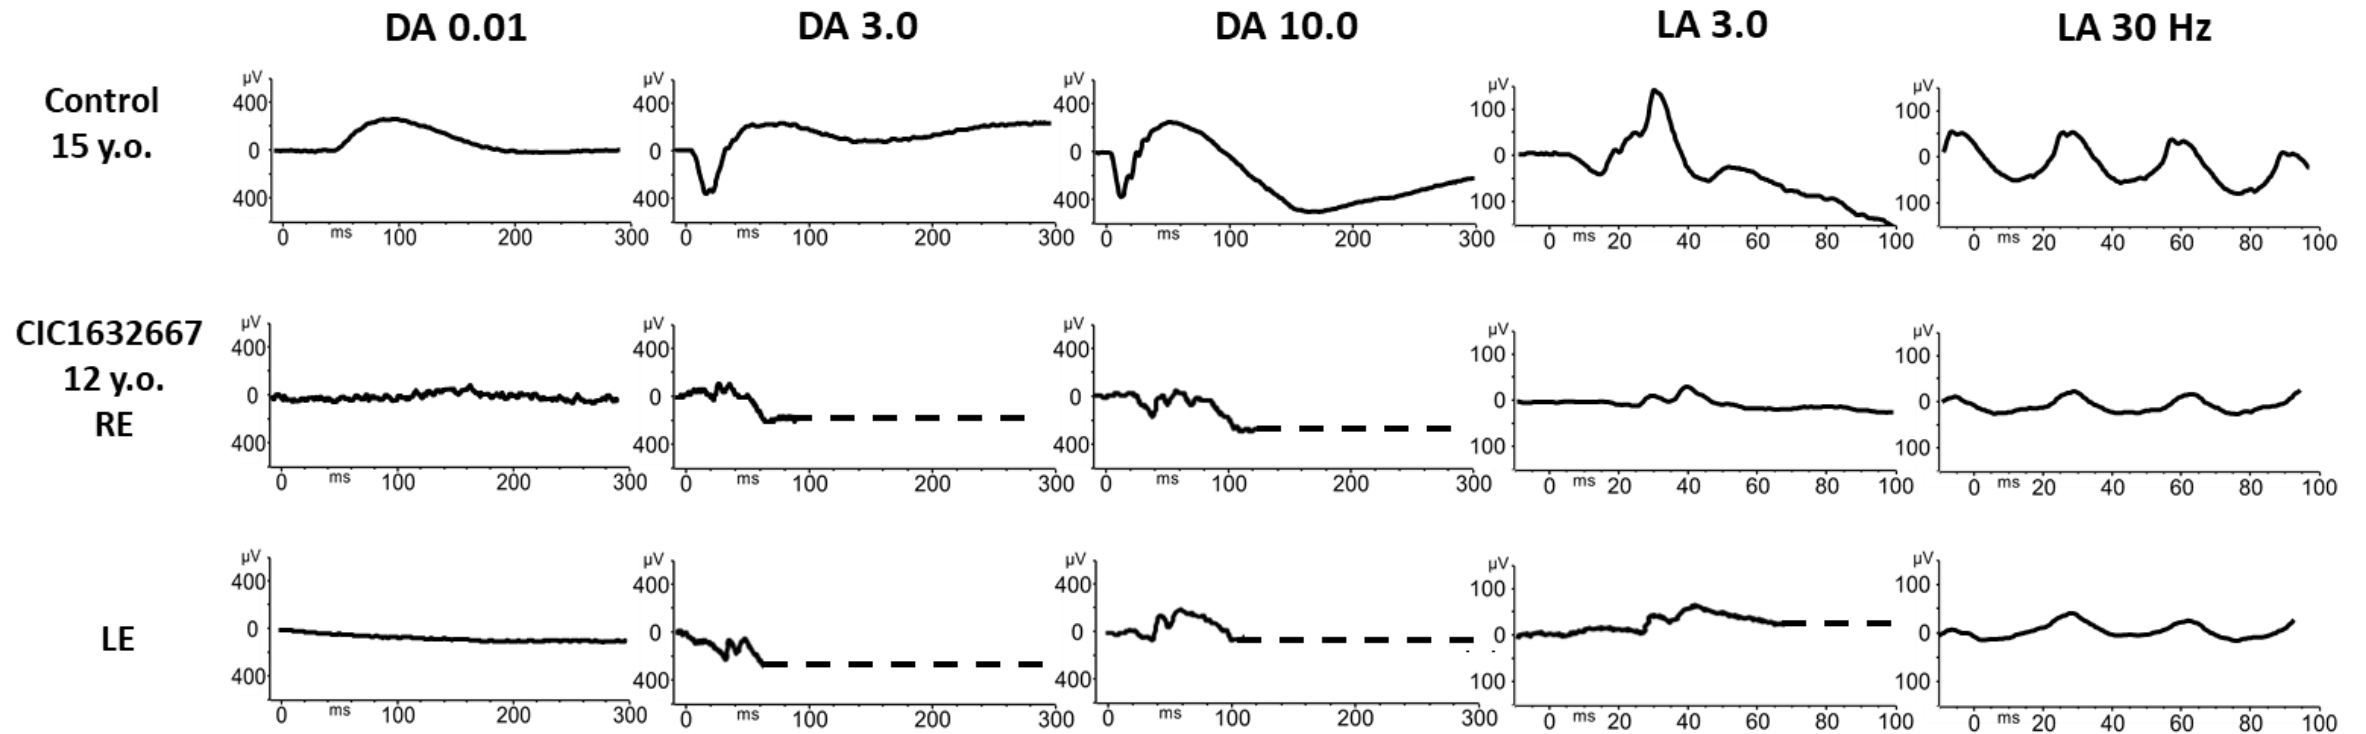

No response to the dim dark adapted flash (DA 0.01), severely reduced amplitude and increased implicit time for the dark adapted bright flashes (DA 3.0 and DA 10.0) and for light-adapted stimuli (LA 3.0 and LA 30 Hz flicker) in keeping with generalized rod-cone dysfunction.

# Supplementary Figure S3. Full Stimulus Threshold

## A. FST before treatment

| Average Results Table |       |     |       |     |     |    |   |     |            |    |        |     |
|-----------------------|-------|-----|-------|-----|-----|----|---|-----|------------|----|--------|-----|
| #                     | Color | Eye | dB    | EB% | EM% | TO | n | Qty | Date       | P0 | Y      | K   |
| 4                     | White | RE  | -17,3 | 0   | 0   | 0  | 3 | 3   | 22/10/2020 | 0  | 57,942 | 100 |

| Individual Results Table |       |     |       |     |     |    |    |     |            |    |        |     |          |
|--------------------------|-------|-----|-------|-----|-----|----|----|-----|------------|----|--------|-----|----------|
| #                        | Color | Eye | dB    | EB% | EM% | TO | n  | Qty | Date       | P0 | Y      | K   | Time     |
| 1                        | White | RE  | -17,3 | 0   | 50  | 0  | 24 | 3   | 22/10/2020 | 0  | 57,942 | 100 | 00:01:55 |
| 2                        | White | RE  | -17,3 | 0   | 33  | 0  | 32 | 3   | 22/10/2020 | 0  | 57,942 | 100 | 00:02:36 |
| 3                        | White | RE  | -17,3 | 0   | 50  | 0  | 24 | 3   | 22/10/2020 | 0  | 57,942 | 100 | 00:01:55 |

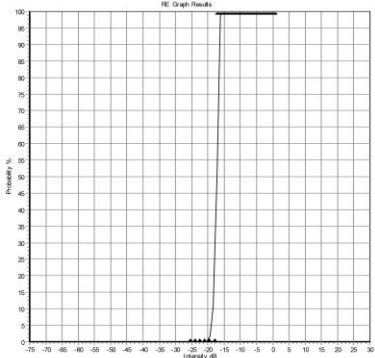

| Average Results Table |       |     |       |     |     |    |   |     |            |    |        |     |
|-----------------------|-------|-----|-------|-----|-----|----|---|-----|------------|----|--------|-----|
| #                     | Color | Eye | dB    | EB% | EM% | TO | n | Qty | Date       | P0 | Y      | K   |
| 4                     | White | LE  | -15,4 | 0   | 0   | 0  | 3 | 3   | 22/10/2020 | 0  | 59,818 | 100 |

| Individual Results Table |       |     |       |     |     |    |    |     |            |    |        |        |          |
|--------------------------|-------|-----|-------|-----|-----|----|----|-----|------------|----|--------|--------|----------|
| #                        | Color | Eye | dB    | EB% | EM% | TO | n  | Qty | Date       | P0 | Y      | K      | Time     |
| 1                        | White | LE  | -15,7 | 0   | 100 | 0  | 32 | 3   | 22/10/2020 | 0  | 59,547 | 100    | 00:02:36 |
| 2                        | White | LE  | -15,2 | 0   | 100 | 0  | 32 | 3   | 22/10/2020 | 0  | 59,987 | 100    | 00:02:36 |
| 3                        | White | LE  | -13,6 | 0   | 80  | 0  | 24 | 3   | 22/10/2020 | 0  | 62,281 | 26,534 | 00:01:55 |

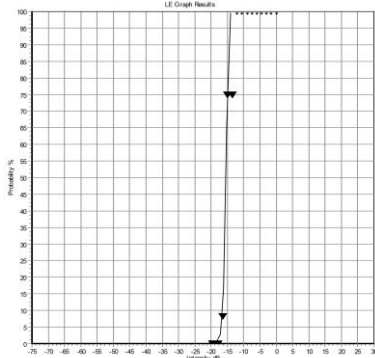

Initial FST to achromatic stimulus revealed severely reduced threshold for the white stimulus under dark-adapted conditions: -17.3dB in RE and -15.4dB in LE

## B. FST after treatment M+5

| Average Results Table |       |     |       |     |     |    |   |     |            |    |        |    |
|-----------------------|-------|-----|-------|-----|-----|----|---|-----|------------|----|--------|----|
| #                     | Color | Eye | dB    | EB% | EM% | TO | n | Qty | Date       | P0 | Y      | K  |
| 4                     | White | RE  | -21.7 | 0   | 0   | 0  | 3 | 3   | 25/03/2021 | 0  | 53,744 | 49 |

| Individual Results Table |       |     |       |     |     |    |    |     |            |    |        |      |          |
|--------------------------|-------|-----|-------|-----|-----|----|----|-----|------------|----|--------|------|----------|
| #                        | Color | Eye | dB    | EB% | EM% | TO | n  | Qty | Date       | P0 | Y      | K    | Time     |
| 1                        | White | RE  | -22,5 | 0   | 62  | 0  | 32 | 3   | 25/03/2021 | 0  | 52,867 | 48,9 | 00:02:36 |
| 2                        | White | RE  | -21,6 | 0   | 66  | 0  | 32 | 3   | 25/03/2021 | 0  | 53,552 | 100  | 00:02:36 |
| 3                        | White | RE  | -21,0 | 0   | 66  | 0  | 32 | 3   | 25/03/2021 | 0  | 54,527 | 37,7 | 00:02:36 |

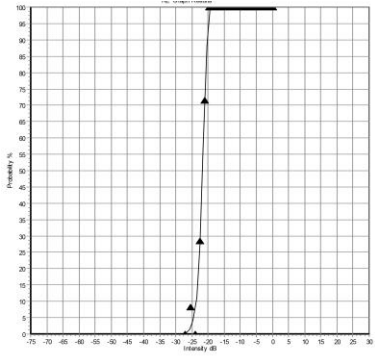

| Average Results Table |       |     |       |     |     |    |   |     |            |    |        |    |
|-----------------------|-------|-----|-------|-----|-----|----|---|-----|------------|----|--------|----|
| #                     | Color | Eye | dB    | EB% | EM% | TO | n | Qty | Date       | P0 | Y      | K  |
| 4                     | White | LE  | -21,9 | 0   | 0   | 0  | 3 | 3   | 25/03/2021 | 0  | 53,603 | 36 |

| Individual Results Table |       |     |       |     |     |    |    |     |            |    |        |      |          |
|--------------------------|-------|-----|-------|-----|-----|----|----|-----|------------|----|--------|------|----------|
| #                        | Color | Eye | dB    | EB% | EM% | TO | n  | Qty | Date       | P0 | Y      | K    | Time     |
| 1                        | White | LE  | -21,7 | 0   | 71  | 0  | 32 | 3   | 25/03/2021 | 0  | 53,513 | 100  | 00:02:36 |
| 2                        | White | LE  | -21,9 | 0   | 57  | 0  | 32 | 3   | 25/03/2021 | 0  | 53,832 | 25,9 | 00:02:36 |
| 3                        | White | LE  | -22,5 | 0   | 0   | 0  | 32 | 3   | 25/03/2021 | 0  | 53,064 | 31,7 | 00:02:36 |

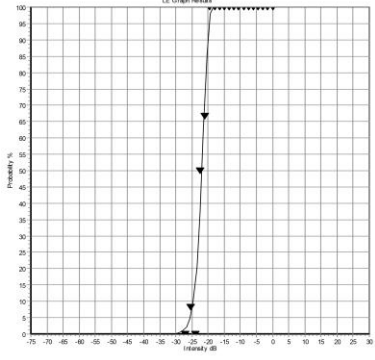

FST changes from baseline at M+5: 25 and 40% dark-adapted threshold decrease for RE and LE respectively

## C. FST after treatment M+12

| Average Results Table |       |     |       |     |     |    |   |     |            |    |        |       |
|-----------------------|-------|-----|-------|-----|-----|----|---|-----|------------|----|--------|-------|
| #                     | Color | Eye | dB    | EB% | EM% | TO | n | Qty | Date       | P0 | Y      | K     |
| 4                     | White | RE  | -38,5 | 0   | 0   | 0  | 3 | 2   | 21/10/2021 | 0  | 37,028 | 27,82 |

| Individual Results Table |       |     |       |     |     |    |    |     |            |    |        |        |          |
|--------------------------|-------|-----|-------|-----|-----|----|----|-----|------------|----|--------|--------|----------|
| #                        | Color | Eye | dB    | EB% | EM% | TO | n  | Qty | Date       | P0 | Y      | K      | Time     |
| 1                        | White | RE  | -38,8 | 0   | 30  | 0  | 48 | 1   | 21/10/2021 | 0  | 36,327 | 100    | 00:03:56 |
| 2                        | White | RE  | -36,6 | 0   | 50  | 0  | 40 | 3   | 21/10/2021 | 0  | 38,53  | 100    | 00:03:16 |
| 3                        | White | RE  | -39,8 | 0   | 40  | 0  | 48 | 1   | 21/10/2021 | 0  | 36,118 | 14,941 | 00:03:56 |

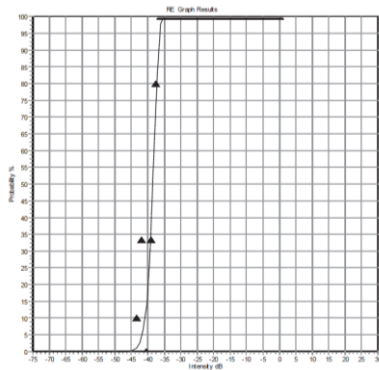

| Average Results Table |       |     |       |     |     |    |   |     |            |    |        |        |
|-----------------------|-------|-----|-------|-----|-----|----|---|-----|------------|----|--------|--------|
| #                     | Color | Eye | dB    | EB% | EM% | TO | n | Qty | Date       | P0 | Y      | K      |
| 4                     | White | LE  | -48,5 | 0   | 0   | 0  | 3 | 1   | 21/10/2021 | 0  | 27,664 | 8,2438 |

| Individual Results Table |       |     |       |     |     |    |    |     |            |            |        |        |          |
|--------------------------|-------|-----|-------|-----|-----|----|----|-----|------------|------------|--------|--------|----------|
| #                        | Color | Eye | dB    | EB% | EM% | TO | n  | Qty | Date       | P0         | Y      | K      | Time     |
| 1                        | White | LE  | -46,5 | 0   | 0   | 0  | 56 | 1   | 21/10/2021 | 0          | 28,605 | 100    | 00:04:37 |
| 2                        | White | LE  | -47,0 | 0   | 10  | 0  | 48 | 1   | 21/10/2021 | 0          | 28,065 | 100    | 00:03:56 |
| 3                        | White | LE  | -50,9 | 28  | 0   | 0  | 56 | 2   | 21/10/2021 | 1,008E-010 | 25,076 | 9,6285 | 00:04:37 |

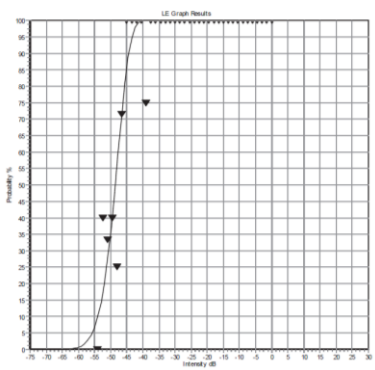

FST changes from baseline at M+12: 123 and 215% dark-adapted threshold decrease for RE and LE respectively



## Supplementary Figure S4. Wide-field fundus photography

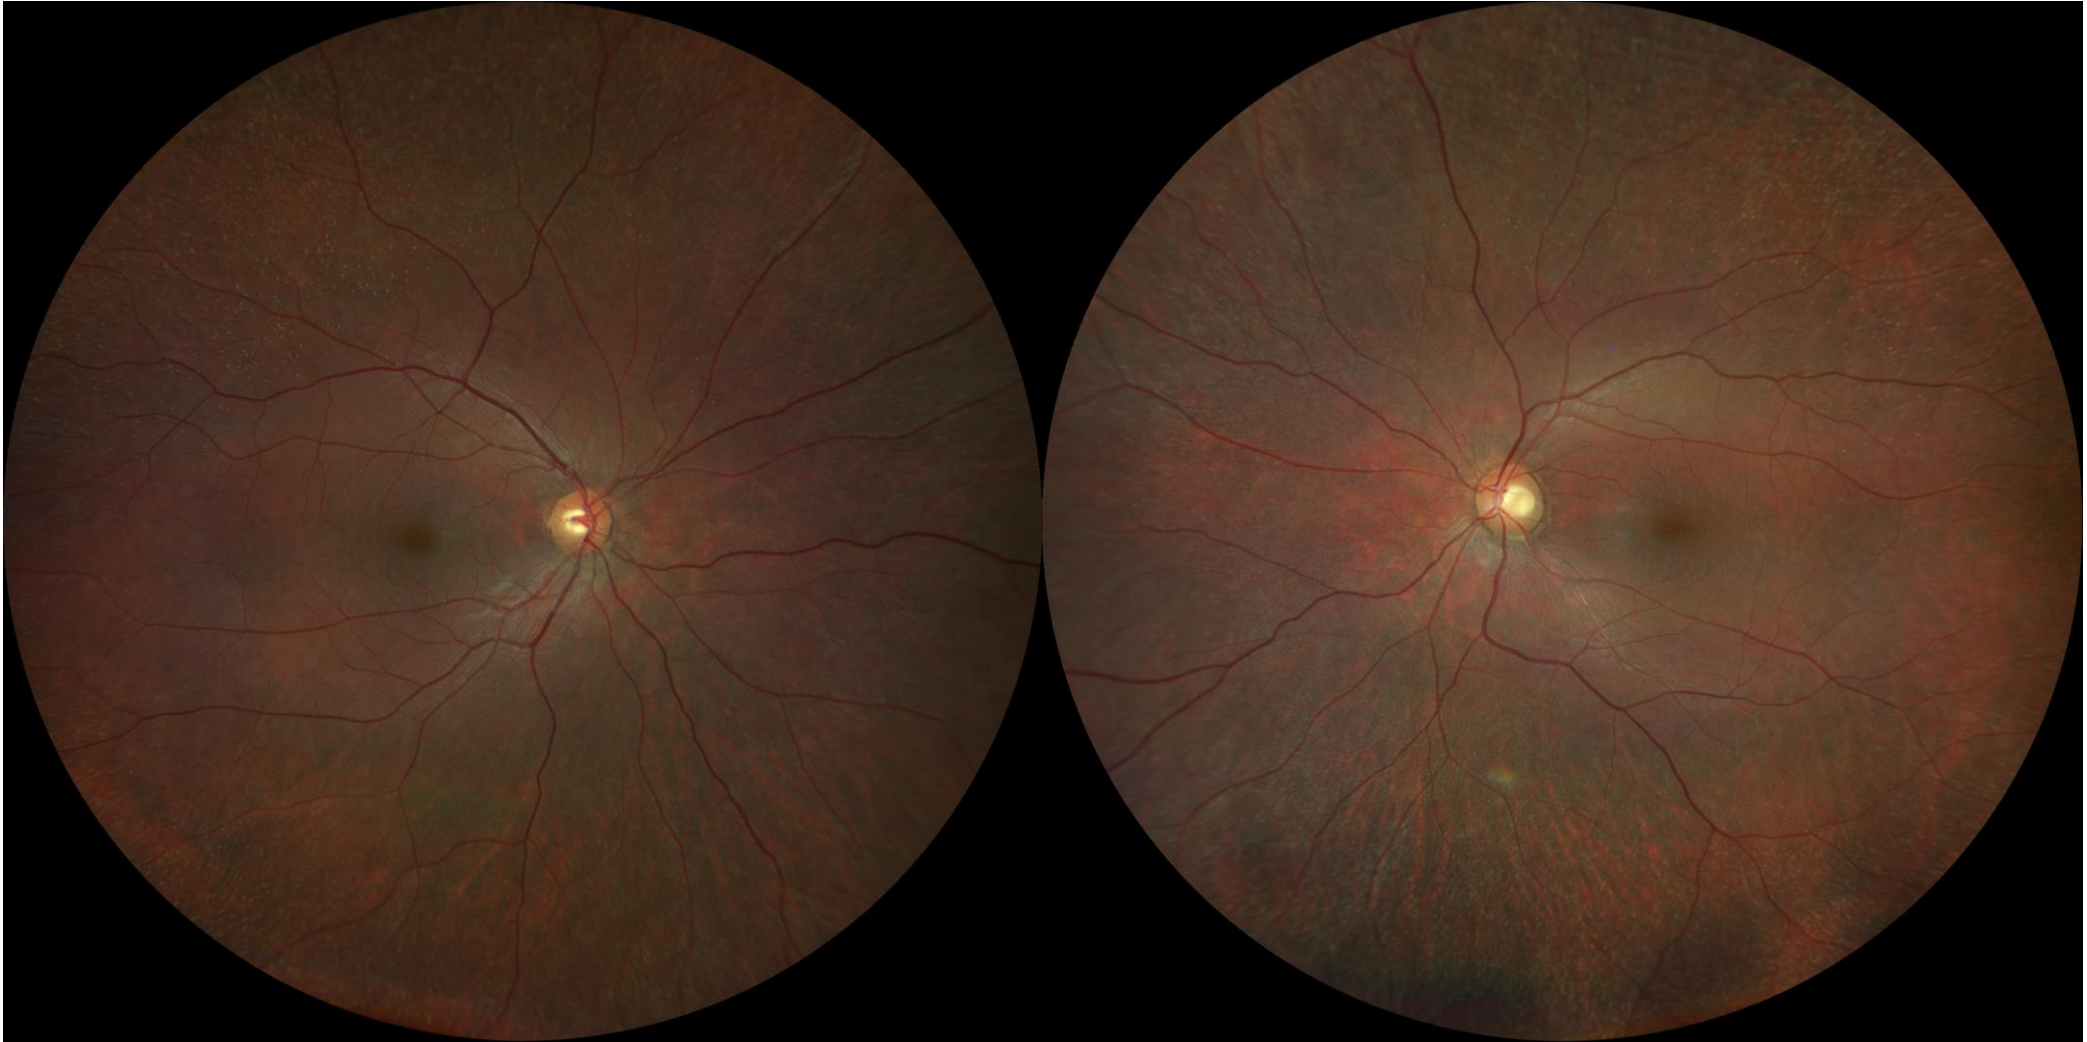

Numerous white dots scattered in the mid and far periphery with no pigmentary or atrophic retinal changes. 5
